# Supplementary material
Source: PubMed Central journal article supplement (PMC3442598)
Supplement: supp_tpc.112.097253_tpc097253Suppl.pdf [file supp_tpc.112.097253_tpc097253Suppl.pdf]

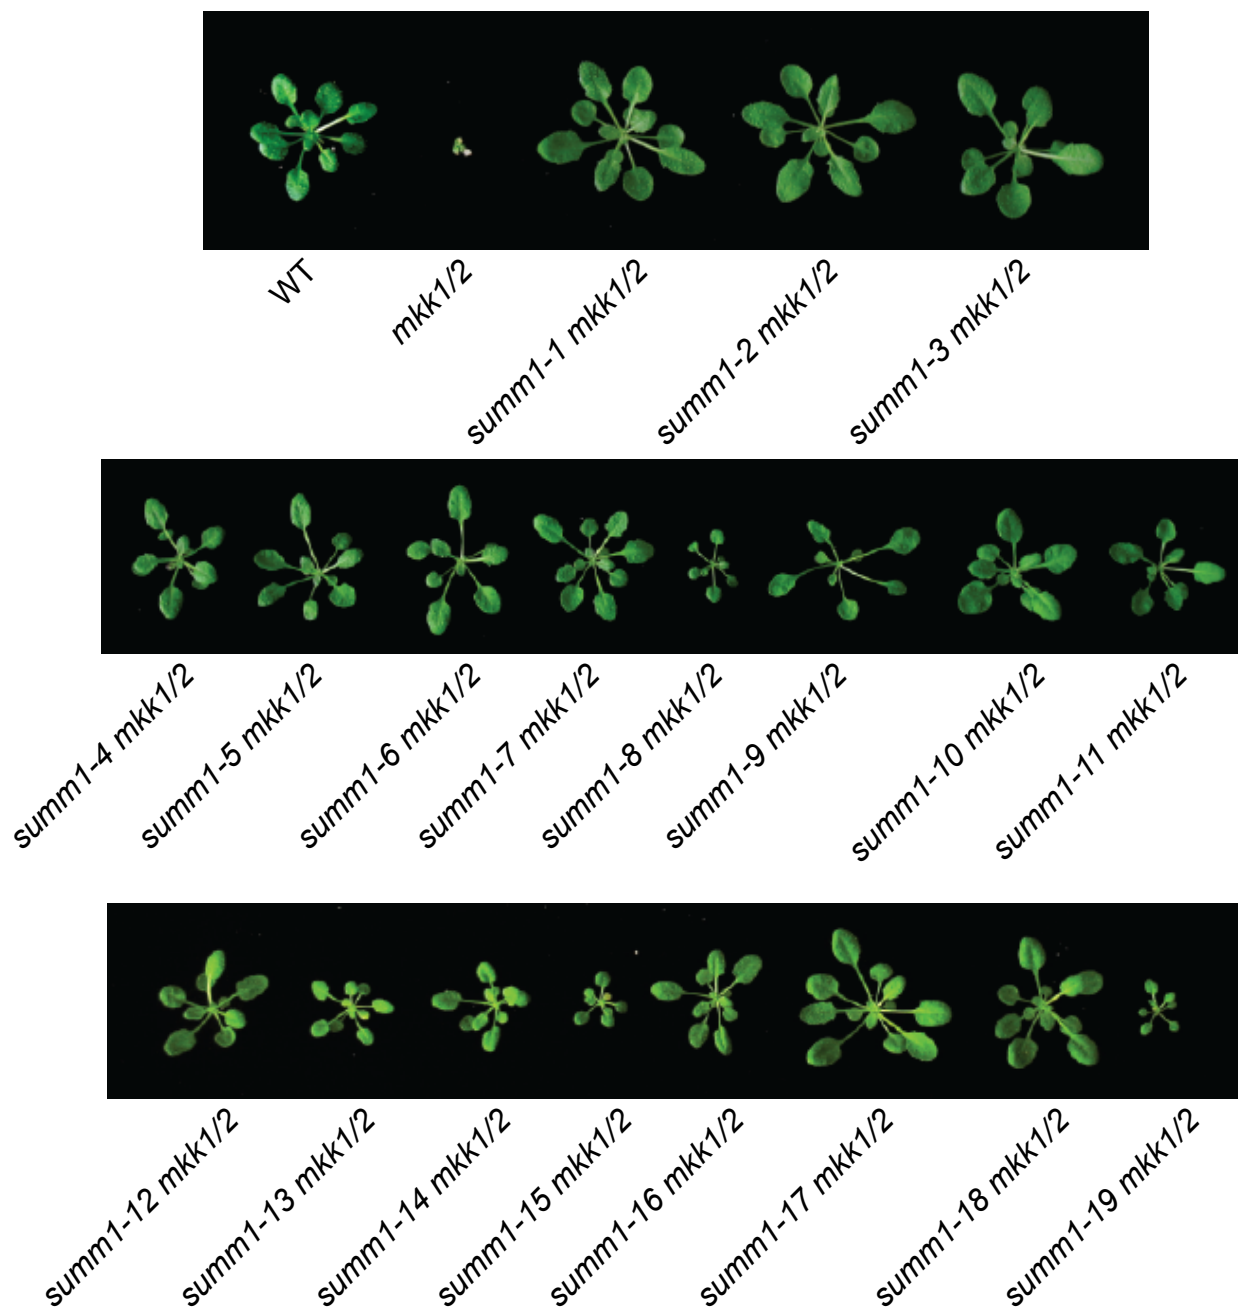

**Supplemental Figure 1. Morphological phenotypes of wild type, *mkk1-1 mkk2-1* and different *summ1* mutant alleles.** Plants were grown on soil at 23°C and photographed approximately four weeks after planting.

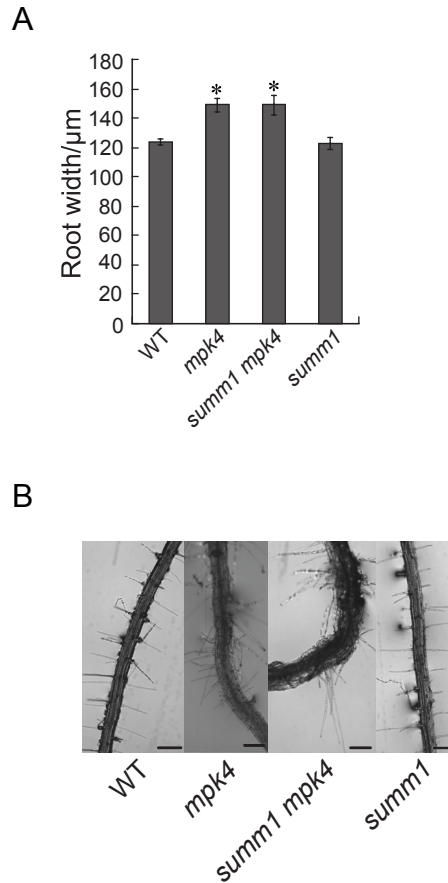

**Supplemental Figure 2. Development defects in the roots of *mpk4-3* are not suppressed by *summ1-1*.**

(A) Root width of wild type (WT), *mpk4-3* (*mpk4*), *summ1-1 mpk4-3* (*summ1 mpk4*) and *summ1-1* (*summ1*). Root width of six-day-old seedlings grown vertically on 1/2 MS medium was measured at ~200  $\mu\text{m}$  distance from the tip. \* $P < 0.001$ , statistical difference from wild-type. Error bars represent standard deviations of fifteen measurements.

(B) Root morphology of wild type (WT), *mpk4-3* (*mpk4*), *summ1-1 mpk4-3* (*summ1 mpk4*) and *summ1-1* (*summ1*). Six-day-old seedlings grown vertically on 1/2 MS medium were photographed under microscopy. Bars = 100  $\mu\text{m}$ .

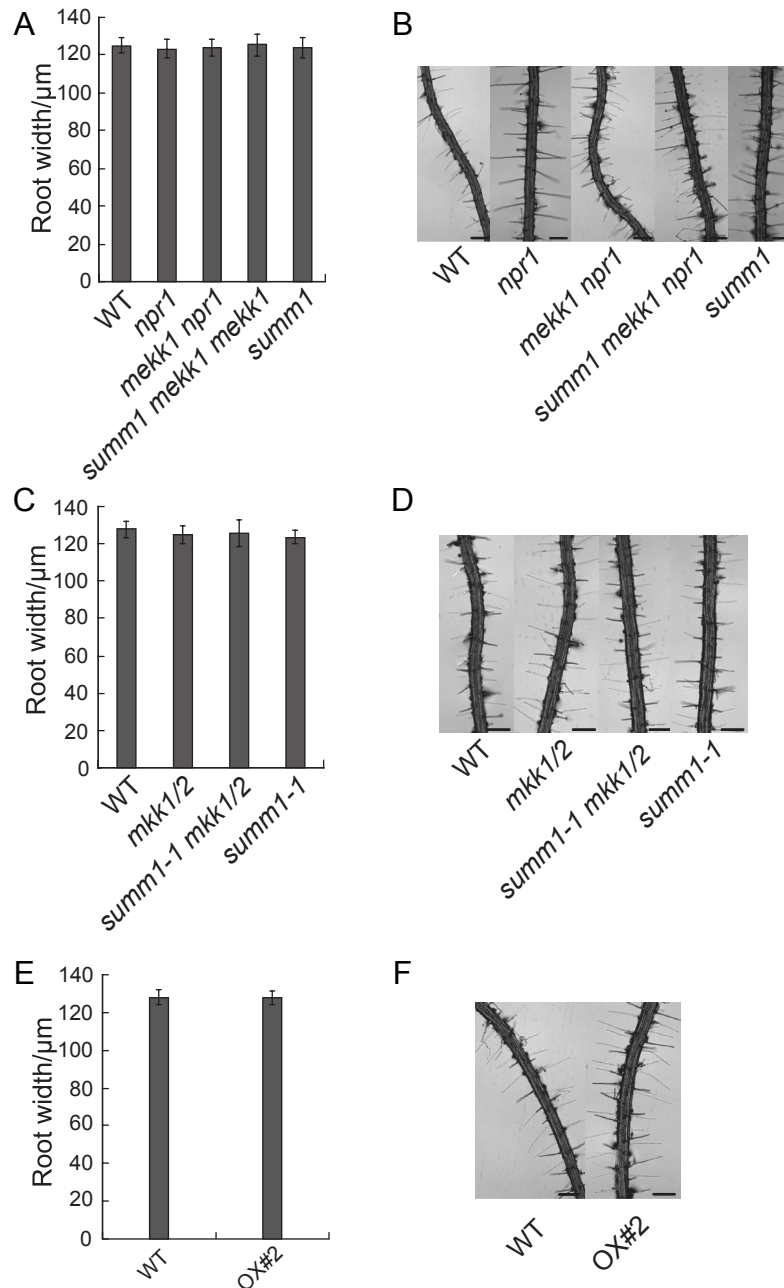

**Supplemental Figure 3. *MEKK1*, *MKK1/MKK2* and *SUMM1* are not required for root development.**

(A-B) Root width (A) and morphology (B) of wild type (WT), *npr1-1* (*npr1*), *mekk1-4 npr1-1* (*mekk1 npr1*), *summ1-3 mekk1-4 npr1-1* (*summ1 mekk1 npr1*) and *summ1-1* (*summ1*). Error bars represent standard deviations of ten measurements.

(C-D) Root width (C) and morphology (D) of WT, *mkk1/2*, *summ1-1 mkk1/2* and *summ1-1*. Error bars represent standard deviations of ten measurements.

(E-F) Root width (E) and morphology (F) of WT and *SUMM1-FLAG* transgenic line OX#2. Error bars represent standard deviations of ten measurements.

Root width was measured at ~200  $\mu\text{m}$  distance from the tip of six-day-old seedlings grown vertically on 1/2 MS medium. Photographs of the seedlings were taken under microscopy. Bars = 100 $\mu\text{m}$ .

**Supplemental Table 1. Primers used in this work**

| primer           | 5'-3' sequence                          | purpose                         |
|------------------|-----------------------------------------|---------------------------------|
| RT-MEKK2-F       | gctgatatatggagcctcgg                    | RT                              |
| RT-MEKK2-R       | tctacggattagcggagatg                    | RT                              |
| T13D4-F          | cataccaagcctacgtcaac                    | InDel Marker                    |
| T13D4-R          | aaactccctggatcaggcag                    | InDel Marker                    |
| NGA8-F           | gagggcaaactctttatttcgg                  | InDel Marker                    |
| NGA8-R           | tggctttcgttataaacatcc                   | InDel Marker                    |
| F9M13-F          | gattcatgagacgtatagag                    | SNP Marker                      |
| F9M13-Col-R      | cacaatgtaagtttcggtaag                   | SNP Marker                      |
| F9M13-Ler-R      | cacaatgtaagtttcggtaac                   | SNP Marker                      |
| T15F16-F         | ctttcttctcgttgacttg                     | SNP Marker                      |
| T15F16-Col-R     | caattatataactcgttgaggga                 | SNP Marker                      |
| T15F16-Ler-R     | caattatataactcgttgagggt                 | SNP Marker                      |
| SUMM1-Promoter-F | cgggggtaccattctttcggtcgagtg             | pCAMBIA1305-SUMM1-FLAG          |
| SUMM1-Promoter-R | acgcacgcgctcgacgtgagcgcgatgattggt       | pCAMBIA1305-SUMM1-FLAG          |
| SUMM1-F          | acgcacgcgctcgacatgaagaagtcgctcgataag    | pCAMBIA1305-SUMM1-FLAG          |
| SUMM1-R          | cccaagctttctacggattagcggagatg           | pCAMBIA1305-SUMM1-FLAG          |
| MPK4-F           | acgcgctcgaccatgtcggcggagagttgttc        | pBI880-MPK4                     |
| MPK4-R           | aaaactgcagtcacactgagtcttgaggattg        | pBI880-MPK4                     |
| MPK6-F           | acgcacgcgctcgacgatggacggtggtcaggtc      | pBI880-MPK6                     |
| MPK6-R           | cgagctagactagtctattgctgatattctggattg    | pBI880-MPK6                     |
| MEKK2-pBI881-F   | acgcacgcgctcgacgatgaagaagtcgctcgataag   | pBI881-MEKK2/<br>pBI881-MEKK2-N |
| MEKK2-pBI881-R   | ccggaattctcatctacggattagcggag           | pBI881-MEKK2/<br>pBI881-MEKK2-C |
| MEKK2-N-pBI881-R | ccggaattctcaccagagacacaaatcggtg         | pBI881-MEKK2-N                  |
| MEKK2-C-pBI881-F | acgcacgcgctcgacgatgggatctatcaatacttctgg | pBI881-MEKK2-C                  |
| MEKK2-N-pET24c-F | gggaattccatgatgaagaagtcgctcgataag       | pET24c-MEKK2-N                  |
| MEKK2-N-pET24c-R | ccgctcgagagaagtattgatagatccc            | pET24c-MEKK2-N                  |
